# Supplementary material for: Establishment, Genetic Diversity, and Habitat Suitability of Aedes albopictus Populations from Ecuador
Source: MDPI journal article supplement (doi:10.3390/insects13030305), 2022-03-19
Supplement: s1 [file s1]

**Table S1.** Haplotype designation for individuals of *Aedes albopictus* collected in six localities of Ecuador

| Accession N° | ECUs     | Organism                | Country | Locality | Latitude | Longitude | Collection Date | Sex    | Haplotype | Trap        | Reference  |
|--------------|----------|-------------------------|---------|----------|----------|-----------|-----------------|--------|-----------|-------------|------------|
| OK266899     | ECU27416 | <i>Aedes albopictus</i> | Ecuador | Cachaco  | 0,8337   | -78,4023  | 24/10/2018      | Female | H2        | Ovitrap     | This study |
| OK266900     | ECU27417 | <i>Aedes albopictus</i> | Ecuador | Cachaco  | 0,8337   | -78,4023  | 24/10/2018      | Male   | H2        | Ovitrap     | This study |
| OK266901     | ECU27418 | <i>Aedes albopictus</i> | Ecuador | Cachaco  | 0,8337   | -78,4023  | 24/10/2018      | Male   | H2        | Ovitrap     | This study |
| OK266902     | ECU27419 | <i>Aedes albopictus</i> | Ecuador | Cachaco  | 0,8337   | -78,4023  | 12/05/2018      | Male   | H2        | Ovitrap     | This study |
| OK266903     | ECU27420 | <i>Aedes albopictus</i> | Ecuador | Cachaco  | 0,8337   | -78,4023  | 12/05/2018      | Male   | H2        | Ovitrap     | This study |
| OK266904     | ECU27421 | <i>Aedes albopictus</i> | Ecuador | Cachaco  | 0,8337   | -78,4023  | 13/02/2019      | Female | H2        | Ovitrap     | This study |
| OK266905     | ECU27422 | <i>Aedes albopictus</i> | Ecuador | Cachaco  | 0,8337   | -78,4023  | 13/02/2019      | Female | H2        | Ovitrap     | This study |
| OK266906     | ECU27423 | <i>Aedes albopictus</i> | Ecuador | Cachaco  | 0,8337   | -78,4023  | 13/02/2019      | Male   | H2        | Ovitrap     | This study |
| OK266907     | ECU27424 | <i>Aedes albopictus</i> | Ecuador | Cachaco  | 0,8337   | -78,4023  | 07/11/2018      | Female | H2        | Ovitrap     | This study |
| OK266908     | ECU27425 | <i>Aedes albopictus</i> | Ecuador | Cachaco  | 0,8337   | -78,4023  | 07/11/2018      | Female | H2        | Ovitrap     | This study |
| OK266909     | ECU27426 | <i>Aedes albopictus</i> | Ecuador | Cachaco  | 0,8337   | -78,4023  | 28/01/2021      | Male   | H2        | Ovitrap     | This study |
| OK266910     | ECU27427 | <i>Aedes albopictus</i> | Ecuador | Cachaco  | 0,8337   | -78,4023  | 14/01/2021      | Male   | H2        | Ovitrap     | This study |
| OK266911     | ECU27428 | <i>Aedes albopictus</i> | Ecuador | Guadual  | 0,8918   | -78,5022  | 07/01/2021      | Female | H2        | Rubber tire | This study |
| OK266912     | ECU27429 | <i>Aedes albopictus</i> | Ecuador | Guadual  | 0,8918   | -78,5022  | 07/01/2021      | Female | H2        | Rubber tire | This study |
| OK266913     | ECU27430 | <i>Aedes albopictus</i> | Ecuador | Guadual  | 0,8918   | -78,5022  | 28/01/2021      | Male   | H2        | Ovitrap     | This study |
| OK266914     | ECU27431 | <i>Aedes albopictus</i> | Ecuador | Guadual  | 0,8918   | -78,5022  | 28/01/2021      | Female | H2        | Ovitrap     | This study |
| OK266915     | ECU27432 | <i>Aedes albopictus</i> | Ecuador | Guadual  | 0,8918   | -78,5022  | 28/01/2021      | Female | H2        | Rubber tire | This study |
| OK266916     | ECU27433 | <i>Aedes albopictus</i> | Ecuador | Guadual  | 0,8918   | -78,5022  | 28/01/2021      | Female | H2        | Ovitrap     | This study |
| OK266917     | ECU27434 | <i>Aedes albopictus</i> | Ecuador | Guadual  | 0,8918   | -78,5022  | 28/01/2021      | Female | H2        | Rubber tire | This study |
| OK266918     | ECU27435 | <i>Aedes albopictus</i> | Ecuador | Guadual  | 0,8918   | -78,5022  | 28/01/2021      | Male   | H2        | Ovitrap     | This study |
| OK266919     | ECU27436 | <i>Aedes albopictus</i> | Ecuador | Guadual  | 0,8918   | -78,5022  | 04/02/2021      | Male   | H2        | Rubber tire | This study |
| OK266920     | ECU27437 | <i>Aedes albopictus</i> | Ecuador | Guadual  | 0,8918   | -78,5022  | 28/01/2021      | Male   | H2        | Ovitrap     | This study |
| OK266921     | ECU27438 | <i>Aedes albopictus</i> | Ecuador | Lita     | 0,8337   | -78,4017  | 20/02/2019      | Female | H2        | Ovitrap     | This study |
| OK266922     | ECU27439 | <i>Aedes albopictus</i> | Ecuador | Lita     | 0,8337   | -78,4017  | 20/02/2019      | Female | H2        | Ovitrap     | This study |
| OK266923     | ECU27440 | <i>Aedes albopictus</i> | Ecuador | Lita     | 0,8337   | -78,4017  | 20/02/2019      | Female | H2        | Ovitrap     | This study |
| OK266924     | ECU27441 | <i>Aedes albopictus</i> | Ecuador | Lita     | 0,8337   | -78,4017  | 20/02/2019      | Female | H2        | Ovitrap     | This study |
| OK266925     | ECU27442 | <i>Aedes albopictus</i> | Ecuador | Lita     | 0,8337   | -78,4017  | 20/02/2019      | Female | H2        | Ovitrap     | This study |
| OK266926     | ECU27444 | <i>Aedes albopictus</i> | Ecuador | Lita     | 0,8337   | -78,4017  | 20/02/2019      | Male   | H2        | Ovitrap     | This study |

**Table S1.** Continue

| Accession N° | ECUs     | Organism                | Country | Locality              | Latitude | Longitude | Collection Date | Sex    | Haplotype | Trap        | Reference  |
|--------------|----------|-------------------------|---------|-----------------------|----------|-----------|-----------------|--------|-----------|-------------|------------|
| OK266927     | ECU27462 | <i>Aedes albopictus</i> | Ecuador | Lita                  | 0,8337   | -78,4017  | 20/02/2019      | Male   | H2        | Ovitrap     | This study |
| OK266928     | ECU27463 | <i>Aedes albopictus</i> | Ecuador | Lita                  | 0,8337   | -78,4017  | 20/02/2019      | Male   | H2        | Ovitrap     | This study |
| OK266929     | ECU27464 | <i>Aedes albopictus</i> | Ecuador | Lita                  | 0,8337   | -78,4017  | 20/02/2019      | Male   | H2        | Ovitrap     | This study |
| OK266930     | ECU27465 | <i>Aedes albopictus</i> | Ecuador | Lita                  | 0,8337   | -78,4017  | 20/02/2019      | Male   | H2        | Ovitrap     | This study |
| OK266931     | ECU27466 | <i>Aedes albopictus</i> | Ecuador | Lita                  | 0,8337   | -78,4017  | 20/02/2019      | Male   | H2        | Ovitrap     | This study |
| OK266932     | ECU27467 | <i>Aedes albopictus</i> | Ecuador | Lita                  | 0,8337   | -78,4017  | 20/02/2019      | Male   | H2        | Ovitrap     | This study |
| OK266933     | ECU27468 | <i>Aedes albopictus</i> | Ecuador | Guayaquil             | -2,1633  | -79,8938  | 20/04/2017      | Male   | H1        | BG Centinet | This study |
| OK266934     | ECU27469 | <i>Aedes albopictus</i> | Ecuador | Guayaquil             | -2,1633  | -79,8938  | 27/04/2017      | Male   | H1        | BG Centinet | This study |
| OK266935     | ECU27470 | <i>Aedes albopictus</i> | Ecuador | Guayaquil             | -2,1633  | -79,8938  | 11/05/2017      | Male   | H1        | Rubber tire | This study |
| OK266936     | ECU27471 | <i>Aedes albopictus</i> | Ecuador | Guayaquil             | -2,1633  | -79,8938  | 28/04/2017      | Male   | H1        | BG Centinet | This study |
| OK266937     | ECU27472 | <i>Aedes albopictus</i> | Ecuador | Guayaquil             | -2,1633  | -79,8938  | 26/04/2017      | Female | H1        | BG Centinet | This study |
| OK266938     | ECU27473 | <i>Aedes albopictus</i> | Ecuador | Guayaquil             | -2,1633  | -79,8938  | 27/04/2017      | Female | H1        | BG Centinet | This study |
| OK266939     | ECU27474 | <i>Aedes albopictus</i> | Ecuador | Guayaquil             | -2,1633  | -79,8938  | 09/05/2017      | Female | H1        | BG Centinet | This study |
| OK266940     | ECU27475 | <i>Aedes albopictus</i> | Ecuador | Guayaquil             | -2,1633  | -79,8938  | 04/05/2017      | Female | H1        | Hollow rock | This study |
| OK266941     | ECU27476 | <i>Aedes albopictus</i> | Ecuador | Guayaquil             | -2,1633  | -79,8938  | 21/04/2017      | Female | H1        | BG Centinet | This study |
| OK266942     | ECU27303 | <i>Aedes albopictus</i> | Ecuador | Guayaquil             | -2,1633  | -79,8938  | 09/05/2017      | Female | H1        | Immature    | This study |
| OK266943     | ECU27317 | <i>Aedes albopictus</i> | Ecuador | Francisco de Orellana | -0,4412  | -77,0048  | 30/05/2018      | Female | H1        | Metal tube  | This study |
| OK266944     | ECU27309 | <i>Aedes albopictus</i> | Ecuador | Francisco de Orellana | -0,4412  | -77,0048  | 30/05/2018      | Female | H1        | Metal tube  | This study |
| OK266945     | ECU27313 | <i>Aedes albopictus</i> | Ecuador | Francisco de Orellana | -0,4412  | -77,0048  | 30/05/2018      | Male   | H1        | Metal tube  | This study |
| OK266946     | ECU27310 | <i>Aedes albopictus</i> | Ecuador | Francisco de Orellana | -0,4412  | -77,0048  | 30/05/2018      | Male   | H1        | Metal tube  | This study |
| OK266947     | ECU27311 | <i>Aedes albopictus</i> | Ecuador | Francisco de Orellana | -0,4412  | -77,0048  | 30/05/2018      | Male   | H1        | Metal tube  | This study |
| OK266948     | ECU27314 | <i>Aedes albopictus</i> | Ecuador | Francisco de Orellana | -0,4412  | -77,0048  | 30/05/2018      | Male   | H1        | Metal tube  | This study |
| OK266949     | ECU27316 | <i>Aedes albopictus</i> | Ecuador | Francisco de Orellana | -0,4412  | -77,0048  | 30/05/2018      | Male   | H1        | Metal tube  | This study |

**Table S2.** Reported *Aedes albopictus* sequences for COI mitochondrial marker used for phylogenetic relationship analysis

| Accession N° | Organism                      | Locality                     | Cluster   | Haplotype | Reference                            |
|--------------|-------------------------------|------------------------------|-----------|-----------|--------------------------------------|
| KJ012173.1   | <i>Culex quinquefasciatus</i> | Turkey                       | Outgroup  | ---       | Gunay et al., unpublished            |
| MK890402.1   | <i>Aedes aegypti</i>          | Ecuador: Guayaquil           | Outgroup  | ---       | Ponce et al., 2021                   |
| MK890435.1   | <i>Aedes aegypti</i>          | Ecuador: Lita                | Outgroup  | ---       | Ponce et al., 2021                   |
| KX886324.1   | <i>Aedes albopictus</i>       | China: Hainan                | Ancestral | ---       | Guo and Zheng, unpublished           |
| KF406456.1   | <i>Aedes albopictus</i>       | Pakistan: Punjab             | Ancestral | ---       | Ashfaq et al., 2014                  |
| MK505590.1   | <i>Aedes albopictus</i>       | Malaysia                     | Ancestral | ---       | Hernandez-Triana et al., 2019        |
| AB690835.1   | <i>Aedes albopictus</i>       | Japan                        | Base      | ---       | Kuwata et al., 2012                  |
| AB907801.1   | <i>Aedes albopictus</i>       | Panama                       | Base      | H72       | Futami et al., 2015                  |
| OK266937.1   | <i>Aedes albopictus</i>       | Ecuador: Guayaquil           | Base      | ---       | This study                           |
| HQ398900.1   | <i>Aedes albopictus</i>       | Viet Nam                     | Base      | ---       | Cook et al., 2010                    |
| JQ412504.1   | <i>Aedes albopictus</i>       | Turkey: Edirne, Ipsala       | Base      | ---       | Oter et al., 2013                    |
| JX679374.1   | <i>Aedes albopictus</i>       | Italy                        | Base      | ---       | Shaikevich and Talbalaghi, 2013      |
| KC690927.1   | <i>Aedes albopictus</i>       | Singapore                    | Base      | H32       | Zhong et al., 2013                   |
| KF406409.1   | <i>Aedes albopictus</i>       | Pakistan                     | Base      | ---       | Ashfaq et al., 2014                  |
| KM613097.1   | <i>Aedes albopictus</i>       | Thailand                     | Base      | ---       | Ruangsittichai et al., unpublished   |
| KU319443.1   | <i>Aedes albopictus</i>       | Spain                        | Base      | H01       | Brustolin et al., unpublished        |
| KU522419.1   | <i>Aedes albopictus</i>       | Morocco: Rabat               | Base      | ---       | Bennouna et al., unpublished         |
| KU926300.1   | <i>Aedes albopictus</i>       | Mauritius                    | Base      | H01       | Walther et al., 2016                 |
| KX266678.1   | <i>Aedes albopictus</i>       | China: Shanghai              | Base      | H42       | Gao et al., 2016 (Direct submission) |
| KX383931.1   | <i>Aedes albopictus</i>       | Albania                      | Base      | A1a2a1    | Battaglia et al., 2016               |
| KX886284.1   | <i>Aedes albopictus</i>       | China: Fujian                | Base      | ---       | Guo and Zheng, unpublished           |
| KX886311.1   | <i>Aedes albopictus</i>       | China: Hainan                | Base      | ---       | Guo and Zheng, unpublished           |
| MF622084.1   | <i>Aedes albopictus</i>       | USA: Ohio                    | Base      | H3        | Giordano et al., unpublished         |
| MF990905.1   | <i>Aedes albopictus</i>       | Portugal                     | Base      | ---       | Osorio et al., 2018                  |
| MG871392.1   | <i>Aedes albopictus</i>       | South Korea                  | Base      | H28       | Lee, E. et al., 2020                 |
| MH817490.1   | <i>Aedes albopictus</i>       | Russia: Adler                | Base      | ---       | Fedorova and Shaikevich, unpublished |
| MK297326.1   | <i>Aedes albopictus</i>       | India                        | Base      | ---       | Lakshmi et al., unpublished          |
| MK439903.1   | <i>Aedes albopictus</i>       | Czech Republic               | Base      | ---       | Kurikova, unpublished                |
| MK505570.1   | <i>Aedes albopictus</i>       | Montenegro: Radovici Village | Base      | ---       | Hernandez-Triana et al., 2019        |

**Table S2.** Continue

| Accession N° | Organism                | Locality                       | Cluster | Haplotype | Reference                                |
|--------------|-------------------------|--------------------------------|---------|-----------|------------------------------------------|
| MK518354.1   | <i>Aedes albopictus</i> | Serbia: Novi Sad               | Base    | ---       | Gojkovic et al., 2019                    |
| MK575475.1   | <i>Aedes albopictus</i> | Brazil                         | Base    | ---       | Lorenz et al., unpublished               |
| MN005054.1   | <i>Aedes albopictus</i> | Greece                         | Base    | ---       | Bisia et al., unpublished                |
| MN080720.1   | <i>Aedes albopictus</i> | Lao PDR                        | Base    | ---       | Motoki et al., 2019                      |
| MN103394.1   | <i>Aedes albopictus</i> | Austria: Tyrol, Kufstein       | Base    | ---       | Fuehrer and Walder, unpublished          |
| MN509201.1   | <i>Aedes albopictus</i> | USA: New York                  | Base    | ---       | Lee, A. et al., 2019 (Direct submission) |
| MN997607.1   | <i>Aedes albopictus</i> | Colombia: Choco, Bellavista    | Base    | ---       | Acosta et al., 2020 (Direct submission)  |
| OK266946     | <i>Aedes albopictus</i> | Ecuador: Francisco de Orellana | Base    | ---       | This study                               |
| AB907796.1   | <i>Aedes albopictus</i> | Costa Rica                     | 1       | ---       | Futami et al., 2015                      |
| KM457524.1   | <i>Aedes albopictus</i> | Netherlands                    | 1       | ---       | van de Vossenbergh et al., 2015          |
| KX886334.1   | <i>Aedes albopictus</i> | China: Hainan                  | 2       | ---       | Guo and Zheng, unpublished               |
| MN080732.1   | <i>Aedes albopictus</i> | Lao PDR                        | 2       | H67       | Motoki et al., 2019                      |
| LC054326.1   | <i>Aedes albopictus</i> | Japan                          | 3       | ---       | Maekawa et al., 2016                     |
| MG871396.1   | <i>Aedes albopictus</i> | South Korea                    | 3       | ---       | Lee, E. et al., 2020                     |
| KC690954.1   | <i>Aedes albopictus</i> | USA: Texas                     | 4       | ---       | Zhong et al., 2013                       |
| MN103393.1   | <i>Aedes albopictus</i> | Austria: Tyrol, Weer Sud       | 4       | ---       | Fuehrer and Walder, unpublished          |
| KM457544.1   | <i>Aedes albopictus</i> | Netherlands                    | 5       | ---       | van de Vossenbergh et al., 2015          |
| KU319445.1   | <i>Aedes albopictus</i> | Spain                          | 5       | ---       | Brustolin et al., unpublished            |
| KF406404.1   | <i>Aedes albopictus</i> | Pakistan: Punjab               | 6       | ---       | Ashfaq et al., 2014                      |
| MG572237.1   | <i>Aedes albopictus</i> | Bangladesh                     | 6       | ---       | Aslam et al., unpublished                |
| KU495082.1   | <i>Aedes albopictus</i> | Australia                      | 7       | ---       | Batovska et al., 2016                    |
| MH025948.1   | <i>Aedes albopictus</i> | Republic of the Congo: Gamboma | 7       | ---       | Kamgnag et al., unpublished              |
| MH330192.1   | <i>Aedes albopictus</i> | Sri Lanka: Negombo             | 7       | ---       | Hapuarachchi et al., unpublished         |
| KX886314.1   | <i>Aedes albopictus</i> | China: Hainan                  | 8       | ---       | Guo and Zheng, unpublished               |
| KX886327.1   | <i>Aedes albopictus</i> | China: Hainan                  | 8       | ---       | Guo and Zheng, unpublished               |
| MH330189.1   | <i>Aedes albopictus</i> | Sri Lanka: Kiribathgoda        | 8       | ---       | Hapuarachchi et al., unpublished         |
| OK266909.1   | <i>Aedes albopictus</i> | Ecuador: Cachaco               | 9       | ---       | This study                               |
| OK266918.1   | <i>Aedes albopictus</i> | Ecuador: Guadual               | 9       | ---       | This study                               |
| KC690922.1   | <i>Aedes albopictus</i> | Singapore                      | 9       | H27       | Zhong et al., 2013                       |

**Table S2.** Continue

| Accession N° | Organism                | Locality                                      | Cluster | Haplotype | Reference                               |
|--------------|-------------------------|-----------------------------------------------|---------|-----------|-----------------------------------------|
| OK266923.1   | <i>Aedes albopictus</i> | Ecuador: Lita                                 | 9       | ---       | This study                              |
| MF148286.1   | <i>Aedes albopictus</i> | Malaysia: Selangor                            | 9       | H38       | Adilah-Amrannudin et al., unpublished   |
| MH921569.1   | <i>Aedes albopictus</i> | Cameroon                                      | 9       | H02       | Kamgang et al., unpublished             |
| MN997608.1   | <i>Aedes albopictus</i> | Colombia: Antioquia, Murind                   | 9       | ---       | Acosta et al., 2020 (Direct submission) |
| MN997609.1   | <i>Aedes albopictus</i> | Colombia: Antioquia, Vigia del<br>Fuerte      | 9       | ---       | Acosta et al., 2020 (Direct submission) |
| MN997610.1   | <i>Aedes albopictus</i> | Colombia: Choco, Bellavista                   | 9       | ---       | Acosta et al., 2020 (Direct submission) |
| MN997611.1   | <i>Aedes albopictus</i> | Colombia: Antioquia, Murindo                  | 9       | ---       | Acosta et al., 2020 (Direct submission) |
| MT345357.1   | <i>Aedes albopictus</i> | Democratic Republic of the Congo:<br>Kinshasa | 9       | ---       | Wat'senga Tezzo et al., 2021            |
| MT345358.1   | <i>Aedes albopictus</i> | Democratic Republic of the Congo:<br>Kinshasa | 9       | ---       | Wat'senga Tezzo et al., 2021            |

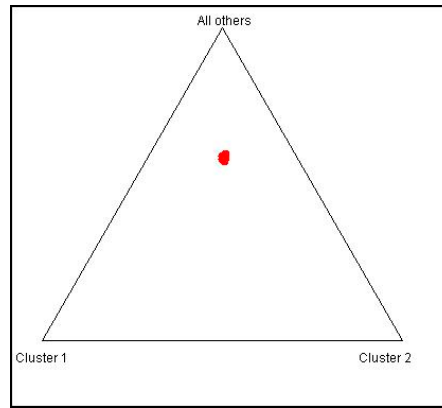

**Figure S1.** Triangular plot produced by the Structure, showing only one genetic cluster in the Ecuadorian populations of *Aedes albopictus*.

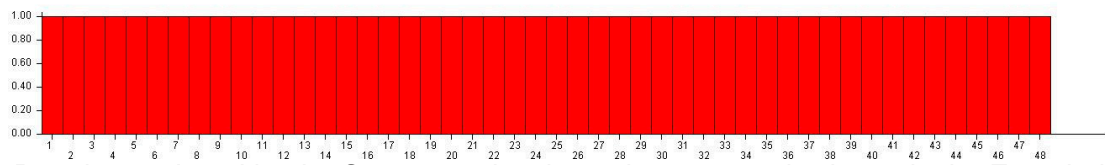

**Figure S2.** Bar plot produced by the Structure, showing only one genetic cluster in the Ecuadorian populations of *Aedes albopictus*.
